1  
2  
3  
4  
5  
6  
7  
8  
9  
10  
11  
12  
13  
14  
15  
16  
17  
18  
19  
20  
21  
22  
23  
24

Heat stress-induced heat shock protein 70 (HSP70) expressions among vulnerable populations in urban and rural areas Klang Valley, Malaysia

Siti Nurfahirah Muhamad<sup>1</sup>, Abdah Md Akim<sup>2</sup>, Fang Lee Lim<sup>3</sup>, Nur Shabrina Azreen Mohd Shabri<sup>1</sup>, Vivien How<sup>1\*</sup>

<sup>1</sup> Department of Environmental and Occupational Health, Universiti Putra Malaysia, Serdang, Selangor, Malaysia

<sup>2</sup> Department of Biomedical Sciences, Universiti Putra Malaysia, Serdang, Selangor, Malaysia

<sup>3</sup> Department of Environmental Engineering, Universiti Tunku Abdul Rahman, Kampar, Perak, Malaysia

\* Corresponding author

E-mail: [vivien@upm.edu.my](mailto:vivien@upm.edu.my)

## 1 Abstract

2 As climate change raises global temperatures, there remains a notable gap in understanding the body's mechanism of the heat stress defense exhibited by Heat  
3 Shock Protein (HSP) within the populations. This study aims to evaluate the expression of heat shock protein 70 (HSP70) in vulnerable populations living in urban and rural  
4 areas in response to heat exposure. A comparative cross-sectional study involved 54 urban and 54 rural participants from Klang Valley, Malaysia. This study comprises  
5 four methods: Part I involves conducting face-to-face interviews questionnaire; Part II involves monitoring indoor heat exposure and classifying thermal stress using the  
6 Universal Thermal Climate Index (UTCI); Part III involves using the reverse-transcription quantitative polymerase chain reaction (RT-qPCR) and Part IV involves using  
7 the HSP70 High Sensitivity Enzyme-linked Immunosorbent Assay (ELISA). The findings revealed that urban areas have a higher heat level, classified as strong UTCI  
8 thermal stress (32.1°C), whereas rural areas have moderate UTCI thermal stress (31.0°C). In response to heat stress, the urban vulnerable populations exhibited higher  
9 HSP70 gene expression ( $0.167 \pm 0.86$ ) compared to the rural ( $0.154 \pm 0.28$ ). A significant difference ( $p < 0.001$ ) in HSP70 protein expression was observed in the plasma of  
10 urban compared to rural vulnerable populations. There was a strong association between UTCI heat exposure level and the expression of the HSP70 gene and protein in  
11 both vulnerable population groups ( $p < 0.001$ ). Although susceptible to vulnerabilities, the populations demonstrated HSP70 expressions in response to varying levels of heat  
12 exposure as a coping mechanism at the cellular level.

## 15 Introduction

16 Climate change, driven by the increase in average global temperatures due to the release of greenhouse gases, poses significant adverse effects [1]. Methane,  
17 chlorofluorocarbon, and nitrous oxide are examples of greenhouse gases that contribute to the greenhouse effect. These gases trap solar radiation, leading to elevated global  
18 temperatures and changes in weather patterns. As a result, the frequency and intensity of heat waves are anticipated to increase. Heatwaves are extreme heat events that  
19 profoundly impact the environment, infrastructure, human health, and social well-being [2].

20  
21 Urban areas characterized by high population density and unanticipated climate variations are prone to the Urban Heat Island (UHI) phenomenon and  
22 heightened heat exposure. Malaysia is also affected by this phenomenon, as seen in the increasing trend of daily temperatures over the past decade [3, 4]. Excessive heat  
23 exposure can lead to heat stress, heat-related illnesses such as heat stroke, an elevated risk of respiratory, cardiovascular, and renal issues, and unfavorable perinatal outcomes

24 [5-7]. However, the risk of these adverse effects can be mitigated through heat acclimatization, a process in which repeated exposure allows the body to adjust and sustain  
25 optimal performance in varying circumstances [7, 8].

26

27 The physiological response that ensues to maintain an optimal core body temperature, such as heat dissipation and the activation of HSPs, specifically HSP70,  
28 play a vital role in thermotolerance. The HSP70 gene and protein are constantly expressed at essential levels in normal physiological conditions as a part of protein  
29 homeostasis [9, 10]. When the body is exposed to elevated temperature, heat shock factors (HSFs) will be activated and attach to the HSP70 gene to form heat shock  
30 elements (HSEs), ultimately leading to the transcription of the HSP70 gene [9]. It would later translate into protein to facilitate the cellular response, safeguarding the cell  
31 from potentially harmful high temperatures that could cause damage to the cell [11].

32

33 Among the family of HSPs, HSP70 is the most thermally sensitive and functions as a cellular thermometer. It reacts to heat stress and other stimuli to support  
34 cellular processes, promote cell survival, and prevent apoptosis [9, 12-15]. Dysregulation of thermal control can cause cellular damage, hypercoagulation with suppressed  
35 fibrinolysis, and hyperinflammation, ultimately resulting in the lethal consequences of heat stroke [16-17]. Therefore, understanding the dynamics of HSPs, especially  
36 HSP70, is essential for comprehending the body's defense mechanisms against heat-related adverse effects.

37

38 Previous studies have provided increasing evidence that vulnerable populations are the most affected by heat-related mortality and morbidity impacts [5, 18-  
39 20]. Due to the disproportionate effects of climate change on different vulnerabilities, such as the low-income, elderly, minorities, and those with chronic health conditions  
40 [21, 22], previous studies have primarily focused on urban areas, overlooking the vulnerabilities and adaptations of rural communities. Therefore, this study aims to  
41 investigate the expression level of HSP70 to heat exposure among vulnerable populations in urban and rural environments. This research seeks to provide valuable insights  
42 into the adaptive capabilities of different populations in dealing with heat-related adverse effects. The findings will serve as a baseline for improving strategies to mitigate  
43 the severity of health impacts associated with climate change.

44

45

## 46 **Materials and methods**

### 47 **Participants**

48 A comparative cross-sectional study was conducted among 108 Malaysians aged 13 and above. The data was collected from 28 July to 23 September 2022  
49 during the Southwest Monsoon in Malaysia. A cluster random sampling method was used to select four urban and four rural areas in the Klang Valley regions. Subsequently,  
50 a stratified random sampling method was utilized to ensure an equal number of respondents from both urban and rural areas. The study included individuals from vulnerable  
51 groups, including senior citizens (aged 60 years or older), low-income individuals (those in B40 groups who represent the bottom 40% of income in Malaysia), and  
52 individuals with health morbidities, which live in their current residential areas more than one year. On the other hand, pregnant women and individuals under 13 years were  
53 excluded from this study. Written consent was obtained from participants and parents or guardians for minors before proceeding with the data and samples collection.  
54 During the data collection, several methods were conducted, including a face-to-face questionnaire, indoor heat exposure monitoring and thermal stress classification using  
55 the UTCI, and blood sample collection for RT-qPCR and ELISA analysis. The data collection took place in a designated room located within the participants' residential  
56 areas to authentically represent the conditions of their living environment.

57

## 58 **Face-to-face questionnaire**

59 A validated questionnaire was used to obtain the sociodemographic background and health status of the study population. The data was obtained through face-  
60 to-face interviews, and only participants who met the inclusive criteria were selected for the study.

61

## 62 **Indoor heat exposure monitoring**

63 The designated area (sampling area) was arranged to operate without the use of any ventilation systems, such as fans and air conditioning (AC). Only windows  
64 were opened for natural ventilation. Indoor heat exposure was monitored using a Wet-bulb Globe Temperature (WBGT) monitor (Model: QUESTemp). The WBGT monitor  
65 was placed at a height of 1.1 meters from the floor level, where the heat stress is at its maximum, based on the recommendation in ISO 7243 [23]. The reading was recorded  
66 during the mid-day hours between 12 noon and 3 p.m. for one hour to measure four parameters simultaneously, which are ambient temperature, radiant temperature, relative  
67 humidity, and air velocity at the same time. The data obtained from WBGT was calculated using the formula of the Universal Thermal Climate Index (UTCI) [24] as  
68 follows:

$$69 \quad \text{UTCI} = 3.21 + 0.872 \times T_a + 0.2459 \times T_{m}^{rt} - 2.5078 \times V_a - 0.0176 \times \text{RH} \quad (1)$$

70 where  $T_a$  is air temperature,  $T_{m}^{rt}$  is mean radiant temperature,  $V_a$  is wind speed, and RH is relative humidity. The calculated value was then used to determine the respondents'  
71 heat exposure level and thermal stress category based on the UTCI equivalent temperature scale [25].

72

### 73 **Blood sample collection for RT-qPCR and ELISA analysis**

74 After the participants were exposed to the designated sampling area indoor temperature for 30 minutes, a total of 5ml blood sample was collected from each  
75 participant via venipuncture blood procedure into two Ethylenediaminetetraacetic acid (EDTA) tubes. Tube A (2ml) was used for RT-qPCR, and Tube B (3ml) was used  
76 for ELISA analysis.

### 77 **Reverse-transcription Quantitative Polymerase Chain Reaction (RT-qPCR)**

78 RT-qPCR was conducted to determine the level of HSP70 gene expression. This method involves RNA isolation, cDNA conversion, and quantitative PCR  
79 (qPCR). A total of 1.5ml blood from Tube A was used to extract the total RNA using the QIAamp RNA Blood Mini Kit (Model: Qiagen) within 24 hours after the blood  
80 samples were collected, following the manufacturer's procedures [26]. The purity of the extracted RNA was assessed by spectrophotometry, and the RNA integrity was  
81 examined using gel electrophoresis before proceeding with cDNA conversion procedures. The cDNA synthesis used the QuantiTech Reverse Transcription Kit (Model:  
82 Qiagen).

83

84 Quantitative PCR (qPCR) provides quantification of HSP70 gene expression. qPCR was conducted using Quantinova SYBR Green PCR kit (Model: Qiagen)  
85 analyzed in the PCR cycler (Model: Mastercycler® ep Realplex 4, Eppendorf, Germany). The three steps of thermal cycling begin with PCR initial activation step (2 mins,  
86 95°C), followed by 2-step cycling of denaturation (5secs, 95°C), and combined annealing or extension (10 secs, 60°C) for a total of 40 cycles. A standard curve was  
87 performed to obtain the PCR efficiency for the primers of the HSP70 gene (NM\_005527.3) and 18SrRNA (housekeeping gene) [27].

88

89 The Ct-values of experimental samples obtained from the qPCR analysis were calculated using relative quantification to get the level of HSP70 gene expression  
90 [28]. The primers' sequences are 5'TTCGTGGCTGGAGGTCAATC-3', 5'-TAATGATTTGAAGATGAGGGG-3' (HSP70 gene) and 5'-  
91 GTGGTGTGAGGAAAGCAGACA-3', 5'-TGATCACACGTCCACCTCATC-3'(18SrRNA) [27]. The average Ct-values of HSP70 and 18srRNA genes for each sample  
92 obtained from the qPCR procedure were calculated in the linear equation generated from the standard curve. The computed value of the HSP70 gene was then normalized  
93 to the 18srRNA gene value to obtain the HSP70 gene expression (expressed in ratio value). The normalization was done to ensure that the quantified HSP70 gene represents  
94 heat-induced expression.

### 95 **HSP70 high-sensitivity Enzyme-linked Immunosorbent Assay (ELISA)**

96 HSP70 protein expression was measured using a sandwich method HSP70 high-sensitivity enzyme-linked immunosorbent assay (ELISA) Kit (Model: Abcam,  
97 ab133061). The blood sample in Tube B was used to analyze HSP70 protein expression levels. The plasma was separated by centrifugation at 1000 x g for 15 minutes at  
98 4°C and prepared with a dilution of 1:4 in the assay buffer. HSP70 concentration levels were expressed in ng/ml. The assay's sensitivity or detection limit is 0.09 ng/mL (90  
99 pg/mL). Quantitative determination of HSP70 in the plasma was performed based on a standard curve [29]. The assayed ELISA plate was immediately analyzed using a  
100 microplate reader (Model: Biotek 800 TS Absorbance Reader). The optical density (OD) absorbance measurement was recorded at 450nm. The results were then calculated  
101 using a standard curve generated using 4PL equations as recommended by the manufacturer's protocol [30].

102

### 103 **Statistical analysis**

104 The data obtained from the respondents were analyzed using Statistical Package for the Social Sciences (SPSS) version 25. The comparison between UTCI  
105 heat exposure level, HSP70 gene, and HSP70 protein expressions was analyzed using the Independent t-test or Mann-Whitney U Test. A correlation test was conducted to  
106 determine the association between the variables. *P*-values less than 0.05 ( $p < 0.05$ ) were considered significant.

107

108

## 109 **Results**

### 110 **Characteristics of the participants**

111 This study involved 108 participants, with 54 respondents from urban and 54 from rural areas. Urban respondents comprised 27.8% senior citizens (60 years  
112 old and above), 90.7% B40 groups (low-income people), and 46.3% people with health morbidity. On average, the participants live in their residential areas about 16.6 ±  
113 6.34 years.

114

115 In rural, there are 29.6% senior citizens, 88.9% B40 groups, and 53.7% people with health morbidity. On average, the participants live in their residential areas  
116 about 30.4 ± 6.52 years. Table 1 shows the sociodemographic characteristics and health status of the study population.

117 **Table 1. Sociodemographic Characteristics and Health Status of the Study Population (N=108)**

| Continuous variables | Urban (n=54) | Rural (n=54) |
|----------------------|--------------|--------------|
|----------------------|--------------|--------------|

|                                           | <b>Mean (SD)</b>              |             |
|-------------------------------------------|-------------------------------|-------------|
| Age (years)                               | 52.8 (11.44)                  | 49.4 (16.1) |
| Body mass index, BMI (kg/m <sup>2</sup> ) | 28.9 (6.99)                   | 27.2 (6.42) |
| Duration of residency (years)             | 16.6 (6.34)                   | 30.4 (6.52) |
| <b>Categorical variables</b>              | <b>Frequency, <i>f</i>(%)</b> |             |
| <b>Age groups</b>                         |                               |             |
| <60 years old                             | 39 (72.2)                     | 38 (70.4)   |
| ≥60 years old                             | 15 (27.8)                     | 16 (29.6)   |
| <b>Gender</b>                             |                               |             |
| Male                                      | 8 (14.8)                      | 18 (33.3)   |
| Female                                    | 46 (85.2)                     | 36 (66.7)   |
| <b>Educational level</b>                  |                               |             |
| No formal education                       | 7 (13.0)                      | 1 (1.6)     |
| Primary school                            | 6 (11.1)                      | 16 (29.6)   |
| Secondary school                          | 37 (68.5)                     | 27 (50.0)   |
| Diploma/STPM/Matriculation                | 4 (7.4)                       | 5 (9.3)     |
| Bachelor                                  | 0 (0.0)                       | 5 (9.3)     |
| <b>Household income (RM)</b>              |                               |             |
| B40 (Below RM4851)                        | 49 (90.7)                     | 48 (88.9)   |
| M40 (RM4851-RM10,970)                     | 5 (9.3)                       | 6 (11.1)    |
| <b>Health morbidity</b>                   |                               |             |
| Yes                                       | 25 (46.3)                     | 29 (53.7)   |
| No                                        | 29 (53.7)                     | 25 (46.3)   |

118 Abbreviations: SD, standard deviation; RM, Ringgit Malaysia

119

## 120 **UTCI heat exposure level**

121 The average UTCI heat exposure level for urban areas is 32.1°C, classified as strong thermal stress. For rural areas, the average UTCI heat exposure level was  
122 31.0 °C, classified as moderate thermal stress. There was a significant mean difference in UTCI heat exposure level between urban and rural areas ( $p<0.001$ ). The results  
123 indicated that urban people were exposed to higher heat stress than rural people. Fig 1 shows the UTCI heat exposure level between urban and rural areas.

124

125 **Fig 1. UTCI Heat Exposure Level between Urban and Rural Areas (N=108)**

126

## 127 **HSP70 gene expression**

128 On average, urban recorded higher HSP70 gene expression ( $0.167 \pm 0.86$ ) than rural vulnerable populations ( $0.154 \pm 0.28$ ). However, there was no significant  
129 difference in HSP70 gene expression between urban and rural vulnerable people ( $p>0.05$ ). Fig 2 shows the distribution of HSP70 gene expression between both groups.

130

131 **Fig 2. Distribution of HSP70 Gene Expression between Urban and Rural Vulnerable Populations (N=108)**

132

## 133 **HSP70 protein expression**

134 Urban demonstrated a higher HSP70 protein expression (2.524 ng/ml) than rural vulnerable populations (2.095 ng/ml). There was a significant mean difference  
135 in HSP70 protein expression between urban and rural vulnerable groups ( $p<0.001$ ). Fig 3 shows the distribution of HSP70 protein expression between both groups.

136

137 **Fig 3. Distribution of HSP70 Protein Expression between Urban and Rural Vulnerable Populations (N=108)**

138

## 139 **Association between UTCI heat exposure level with HSP70 expressions**



140 A correlation test was done to determine the association between UTCI heat exposure level and HSP70 expressions. For urban areas, there was a significant  
 141 positive correlation between UTCI heat exposure level with HSP70 gene expression ( $r = 0.592, p < 0.001$ ) and HSP70 protein expression ( $r = 0.392, p < 0.001$ ). Table 2 shows  
 142 the association between UTCI heat exposure level and HSP70 expressions for urban vulnerable populations.

143 **Table 2. Association between UTCI Heat Exposure Level and HSP70 Expressions for Urban Vulnerable Populations (n=54)**

144 Statistical test: <sup>a</sup> Pearson correlation; <sup>b</sup> Spearman rho

| Variables                             | Heat exposure level <sup>a</sup> | HSP70 gene expression <sup>b</sup> | HSP70 protein expression <sup>a</sup> |
|---------------------------------------|----------------------------------|------------------------------------|---------------------------------------|
| Heat exposure level <sup>a</sup>      | 1                                |                                    |                                       |
| HSP70 gene expression <sup>b</sup>    | 0.592**                          | 1                                  |                                       |
| HSP70 protein expression <sup>a</sup> | 0.392**                          | 0.395**                            | 1                                     |

145 \* Correlation is significant at the 0.05 level (2-tailed)

146 \*\* Correlation is significant at the 0.01 level (2-tailed)

147

148 For rural areas, there was a significant positive correlation between UTCI heat exposure level with HSP70 gene expression ( $r = 0.578, p < 0.001$ ) and HSP70  
 149 protein expression ( $r = 0.360, p < 0.001$ ). Table 3 shows the association between UTCI heat exposure level and HSP70 expressions for rural vulnerable populations.

150 **Table 3. Association between UTCI Heat Exposure Level and HSP70 Expressions for Rural Vulnerable Populations (n=54)**

| Variables                             | Heat exposure level <sup>a</sup> | HSP70 gene expression <sup>b</sup> | HSP70 protein expression <sup>a</sup> |
|---------------------------------------|----------------------------------|------------------------------------|---------------------------------------|
| Heat exposure level <sup>a</sup>      | 1                                |                                    |                                       |
| HSP70 gene expression <sup>b</sup>    | 0.578**                          | 1                                  |                                       |
| HSP70 protein expression <sup>a</sup> | 0.360**                          | 0.128                              | 1                                     |

151 Statistical test: <sup>a</sup> Pearson correlation; <sup>b</sup> Spearman rho

152 \* Correlation is significant at the 0.05 level (2-tailed)

153 \*\* Correlation is significant at the 0.01 level (2-tailed)

154

155

## 156 Discussion

157 Expression of the HSP70 gene and protein synthesis are tightly regulated and play a vital role in cellular homeostasis during heat stress [31]. This study found  
158 that urban respondents had higher levels of HSP70 gene and HSP70 protein expression compared to rural respondents. This finding is consistent with the recorded heat  
159 exposure level in both areas, where urban areas recorded higher heat exposure than rural areas. A significant mean difference in HSP70 protein expression was observed  
160 between individuals residing in urban and rural areas ( $p < 0.001$ ). This finding aligns with previous studies that have documented a significant difference in the HSP70 protein  
161 expression at different levels of thermal exposure [32, 33].

162

163 However, there was no significant difference in HSP70 gene expression between urban and rural respondents ( $p > 0.05$ ). The finding can be explained by the  
164 observation that individuals living in urban areas exhibited only a marginally elevated HSP70 gene expression compared to individuals in rural areas. Since the result did  
165 not reflect a similar trend of the HSP70 protein, it can be inferred that the cellular response primarily takes place at the protein level. Even though the expression of the  
166 HSP70 gene plays a role in stress-coping mechanisms, the study suggests that its effects in this context are relatively modest. This finding can be elucidated by the fact that  
167 individuals who have adapted to high temperatures have a substantially elevated baseline level of HSP70 protein [34]. Several analyses comparing HSP70 gene and protein  
168 measurements following heat acclimation found an inconsistency, suggesting that an increase in HSP70 protein levels may not correspond to an increase in HSP70 gene  
169 levels. In fact, another study revealed that once the response requirements of HSP70 are met, the previous built-up of HSP70 protein levels may interact with Heat Shock  
170 Factor 1 (HSF-1) to further inhibit the transcription of the HSP70 genes [11].

171

172 The primary mechanism for negative feedback control involves the binding and decoupling of HSP70 with HSF (HSP: HSP Complex), where the  
173 phosphorylation would later lead to amplifying the transcriptional output [35]. Protein degradation (such as unfolded or denatured proteins) increases as the temperature  
174 rises. This condition induces the separation of chaperone HSP70 from HSF-1, allowing HSF-1 to stimulate the production of more HSP70 and increase the transcription of  
175 the HSP70 gene [36]. Nevertheless, sufficient HSP70 protein is necessary to reinstate proteostasis and prevent cellular stress. The adequate HSP70 protein copes with the  
176 cellular stress, facilitating the binding between HSP70 and HSF-1, leading to a decrease in the phosphorylation and transcription of the HSP70 gene. Although urban  
177 respondents experience higher levels of heat exposure and have significant differences in HSP70 protein, their level of HSP70 gene expression indicates that they are tolerant  
178 to the heat they are exposed to. In other words, urban respondents have sufficient HSP70 protein to maintain the proteostatis, which leads to the repression of HSF-1 and  
179 prevents the activation and induction of new HSP70 gene expression.

180

181           In this study, urban and rural respondents showed a significant association between UTCI heat exposure level and HSP70 expressions. These findings align  
182 with previous research that demonstrated thermal stress can induce HSP70 protein expression [11, 37] and HSP70 gene expression [33, 34]. The previous studies maintained  
183 a constant ambient temperature at 40°C (which exceeds the normal human physiological body temperature range) coupled with a relative humidity of 20-45% and found  
184 an upregulation in the expression of the HSP70 gene [33, 38] and HSP70 protein [34, 39] in leukocytes. In contrast, findings from this study demonstrate a disparity in the  
185 expression of the HSP70 gene and protein in leukocytes between urban and rural respondents, even when exposed to a temperature of 29-31°C (ambient temperature) with  
186 relative humidity of 69-75%.

187

188           While the respondents in this study experienced a lower ambient temperature than the designated exposure level in the previous studies [33, 34, 38, 39], the  
189 elevated relative humidity in Malaysia, known for its hot and humid climate, could greatly affect the overall thermal stress experienced. This finding is supported by a  
190 previous study, which stated that high temperatures (30-40°C) and high humidity (>60%) can increase the risk of heat-related illness and significantly trigger the body's  
191 thermoregulatory response [40]. Furthermore, the heat shock response at the cellular level is a dynamic and adaptive process that is not dependent on reaching the specific  
192 temperature threshold [41]. In fact, it could also be altered by other factors such as exposure duration, intensity, and acclimation to heat [11, 33, 42]. This study revealed  
193 that vulnerable populations living in hot and humid tropical areas are capable of inducing HSP70 expressions as a means of adapting and coping with heat stress.

194

195

## 196 **Conclusion**

197           Overall, this study found that the average UTCI heat exposure level in urban areas was higher than in rural areas. Although experiencing increased heat stress,  
198 vulnerable people in urban demonstrated better heat tolerance compared to rural people based on their HSP70 gene and protein patterns as coping and adapting to heat  
199 stress. This study also suggests that individuals in both urban and rural areas susceptible to heat stress in hot and humid regions have exhibited cellular responses. Therefore,  
200 these recent findings are favorable for addressing the necessary heat mitigation and adaptation responses following the highlighted heat exposure levels and cellular responses  
201 in urban and rural areas. However, different climates may exhibit distinct heat stress responses due to the potential influence of heat acclimatization on the outcome.  
202 Therefore, further investigation of the heat stress response in vulnerable populations is recommended in comparing tropical and temperate climate regions.

203

204

## 205 Acknowledgment

206 The authors thank Mrs. Amrina Mohd Amin and Mrs. Safarina Mohamad Ismuddin for their assistance during the field sampling and laboratory work.

207

208

## 209 References

- 210 1. Sivaramanan S. Global warming and climate change causes, impacts and mitigation. Cent Environ  
211 Authority, Sri Lanka. 2015;2(4):1-26. Available from: <https://doi.org/10.13140/RG.2.1.4889.7128>
- 212 2. Suparta W, Yatim ANM. Characterization of Heat Waves: A Case Study for Peninsular Malaysia.  
213 Geographia Technica. 2019;14(1):146-155. Available from: [https://doi.org/10.21163/GT\\_2019.141.11](https://doi.org/10.21163/GT_2019.141.11)
- 214 3. Tang KHD. Climate change in Malaysia: Trends, contributors, impacts, mitigation, and adaptations. Sci  
215 Total Environ. 2019;650(2):1858-1871. Available from: <https://doi.org/10.1016/j.scitotenv.2018.09.316>
- 216 4. Yatim ANM, Latif MT, Ahamad F, Khan MF, Nadzir MSM, Juneng L. Observed Trends in Extreme  
217 Temperature over the Klang Valley, Malaysia. Adv Atmos Sci. 2019;36(12):1355-1370. Available from:  
218 <https://doi.org/10.1007/s00376-019-9075-0>
- 219 5. Centers for Disease Control and Prevention (CDC). Protecting Vulnerable Groups from Extreme Heat.  
220 Centers for Disease Control and Prevention. 2017 June 19 [Cited 2023 March 20]. Available from:  
221 <https://www.cdc.gov/disasters/extremeheat/specificgroups.html>
- 222 6. Morris KI, Chan A, Morris KJK, Ooi MCG, Oozeer MY, Abakr YA, et al. Urbanisation and urban  
223 climate of a tropical conurbation, Klang Valley, Malaysia. Urban Climate. 2017;19:54–71. Available  
224 from: <https://doi.org/10.1016/j.uclim.2016.12.002>
- 225 7. Zander KK, Mathew S. Estimating economic losses from perceived heat stress in urban Malaysia. Ecol  
226 Econ. 2019;159:84–90. Available from: <https://doi.org/10.1016/j.ecolecon.2019.01.023>
- 227 8. Department of Occupational, Safety and Health Malaysia (DOSH) [Internet]. Guideline on Heat Stress  
228 Management at Workplace. Department of Occupational, Safety and Health, Malaysia. 2016 August 16  
229 [cited 2023 May 18]. Available from:  
230 [https://www.dosh.gov.my/index.php/legislation/guidelines/industrial-hygiene-1/2017-guidelines-heat-](https://www.dosh.gov.my/index.php/legislation/guidelines/industrial-hygiene-1/2017-guidelines-heat-stress-management-at-workplace/file)  
231 [stress-management-at-workplace/file](https://www.dosh.gov.my/index.php/legislation/guidelines/industrial-hygiene-1/2017-guidelines-heat-stress-management-at-workplace/file)
- 232 9. Ponomarenko M, Stepanenko I, Kolchanov N. Heat Shock Proteins. In: Brenner's Encyclopedia of  
233 Genetics. 2013:402–405. Available from: <https://doi.org/10.1016/b978-0-12-374984-0.00685-9>
- 234 10. Sharma D, Masison DC. Hsp70 structure, function, regulation, and influence on yeast prions. Protein  
235 Pept Lett. 2009;16(6):571–581. Available from: <https://doi.org/10.2174/092986609788490230>
- 236 11. Nava R, Zuhl MN. Heat acclimation-induced intracellular HSP70 in humans: a meta-analysis. Cell Stress  
237 Chaperones. 2020;25(1):35–45. Available from: <https://doi.org/10.1007/s12192-019-01059-y>
- 238 12. Zurawlew MJ, Walsh NP, Fortes MB, Potter C. Post-exercise hot water immersion induces heat  
239 acclimation and improves endurance exercise performance in the heat. Scand J Med Sci Sports.  
240 2016;26(7):745–754. Available from: <https://doi.org/10.1111/sms.12638>
- 241 13. Zurawlew MJ, Mee JA, Walsh NP. Heat Acclimation by post-exercise hot water immersion in the  
242 morning reduces thermal strain during morning and afternoon exercise-heat stress. Int J Sports Physiol  
243 Perform. 2021;1-22. Available from: <https://doi.org/10.1123/ijsp.2017-0620>
- 244 14. Miller DJ, Fort PE. Heat Shock Proteins Regulatory Role in Neurodevelopment. Front Neurosci.  
245 2018;12:821. Available from: <https://doi.org/10.3389/fnins.2018.00821>
- 246 15. Rout PK, Kaushik R, Ramachandran N. Differential expression pattern of heat shock protein 70 gene in  
247 tissues and heat stress phenotypes in goats during peak heat stress period. Cell Stress Chaperones.  
248 2016;21(4):645–651. Available from: <https://doi.org/10.1007/s12192-016-0689-1>
- 249 16. Iba T, Helms J, Levi M, Levy JH. Inflammation, coagulation, and cellular injury in heat-induced shock.  
250 Inflamm Res. 2023;72(3):463–473. Available from: <https://doi.org/10.1007/s00011-022-01687-8>

- 251 17. Iba T, Connors JM, Levi M, Levy JH. Heatstroke-induced coagulopathy: Biomarkers, mechanistic  
252 insights, and patient management. *E Clinical Medicine*. 2022;44:101276. Available from:  
253 <https://doi.org/10.1016/j.eclinm.2022.101276>
- 254 18. Nayak SG, Shrestha S, Kinney PL, Ross Z, Sheridan SC, Pantea CI, et al. Development of a heat  
255 vulnerability index for New York State. *Public Health*. 2018;161:127–137. Available from:  
256 <https://doi.org/10.1016/j.puhe.2017.09.006>
- 257 19. Min JY, Lee HS, Choi YS, Min KB. Association between income levels and prevalence of heat- and  
258 cold-related illnesses in Korean adults. *BMC Public Health*. 2021;21:1264. Available from:  
259 <https://doi.org/10.1186/s12889-021-11227-4>
- 260 20. Peng B, Williams S, Loughnan M, Lloyd G, Hansen A, Kjellstrom T, et al. The Effects of Extreme Heat  
261 on Human Mortality and Morbidity in Australia: Implications for Public Health. *Asia Pacific Journal of*  
262 *Public Health*. 2011;23(2):27–36. Available from: <https://doi.org/10.1177/1010539510391644>
- 263 21. Sanchez CSG, Peiro MN, Gonzalez FJN. Urban Heat Island and Vulnerable Population. The Case of  
264 Madrid. In: *Sustainable Development and Renovation in Architecture, Urbanism and Engineering*.  
265 2017:3–13. Available from: [https://doi.org/10.1007/978-3-319-51442-0\\_1](https://doi.org/10.1007/978-3-319-51442-0_1)
- 266 22. Shaharuddin A, Noorazuan MH, Takeuchi W, Noraziah A. The effects of Urban Heat Islands on Human  
267 Comfort: A case of Klang Valley Malaysia. *Global Journal on Advances in Pure & Applied Sciences*.  
268 2014;2:01-08. Available from: <http://www.world-education-center.org/index.php/paas>
- 269 23. ISO 7243 [Internet]. Hot environments-Estimation of the heat stress on working man, based on the  
270 WBGT-index (wet bulb globe temperature). 1989 July [cited 2022 June 15]. Available from:  
271 <https://www.iso.org/standard/13895.html>
- 272 24. Nurhartonosuro IM, Mohd Tamrin SB, Mohd Suadi Nata DH, Karuppiah K, Ng YG. Comparison of  
273 indices to estimate heat exposure to human: a review in tropical regions. *Malays J Med Health Sci*.  
274 2022;18(1):303-315. ISSN 2636-9346
- 275 25. Blazejczyk K, Broede P, Fiala D, Havenith G, Holmer I, Jendritzky G, et al. Principles of the New  
276 Universal Thermal Climate Index (UTCI) and its Application to Bioclimatic Research in European Scale.  
277 *Miscellanea Geographica*. 2010;14(1):91-102. Available from: <https://doi.org/10.2478/mgrsd-2010-0009>
- 278 26. Qiagen [Internet]. QIAamp RNA Blood Mini Kit Handbook. 2021 February [cited 2022 July 10].  
279 Available from: <https://www.qiagen.com/us/products/discovery-and-translational-research/dna-rna-purification/rna-purification/total-rna/qiaamp-rna-blood-mini-kit>
- 280 27. Srivastava K, Narang R, Bhatia J, Saluja D. Expression of heat shock protein 70 gene and its correlation  
281 with inflammatory markers in essential hypertension. *PLoS ONE*. 2016;11(3):e0151060. Available from:  
282 <https://doi.org/10.1371/journal.pone.0151060>
- 283 28. Bustin SA. Absolute quantification of mRNA using real-time reverse transcription polymerase chain  
284 reaction assays. *J Mol Endocrinol*. 2000;25(2):169–193. Available from:  
285 <https://doi.org/10.1677/jme.0.0250169>
- 286 29. Tukaj S, Mantej J, Sobala M, Potrykus K, Sitko K. Autologous extracellular Hsp70 exerts a dual role in  
287 rheumatoid arthritis. *Cell Stress Chaperones*. 2020;25(6):1105-1110. Available from:  
288 <https://doi.org/10.1007/s12192-020-01114-z>
- 289 30. Abcam [Internet]. HSP70 High Sensitivity ELISA Kit (ab133061) Protocol. 2019 January 15 [cited 2022  
290 July 10]. Available from: <https://www.abcam.com/products/elisa/hsp70-high-sensitivity-elisa-kit-ab133061.html>
- 291 31. Almalki AFY, Arabdin M, Khan A. The Role of Heat Shock Proteins in Cellular Homeostasis and Cell  
292 Survival. *Cureus*. 2021;13(9):e18316. Available from: <https://doi.org/10.7759/cureus.18316>
- 293 32. Alharbi BM, Albinhassan TH, Alzahrani RA, Bouchama A, Mohammad S, Alomari AA, et al. Profiling  
294 the Hsp70 Chaperone Network in Heat-Induced Proteotoxic Stress Models of Human Neurons. *Biology*.  
295 2023;12(3):416. Available from: <https://doi.org/10.3390/biology12030416>
- 296 33. Gibson OR, Mee JA, Tuttle JA, Taylor L, Watt PW, Maxwell NS. Isothermic and fixed-intensity heat  
297 acclimation methods induce similar heat adaptation following short and long-term timescales. *J Therm*  
298 *Biol*. 2015;49–50:55–65. Available from: <https://doi.org/10.1016/j.jtherbio.2015.02.005>
- 299 34. Lee BJ, Mackenzie RW, Cox V, James RS, Thake CD. Human monocyte heat shock protein 72 responses  
300 to acute hypoxic exercise after 3 days of exercise heat acclimation. *BioMed research international*.  
301 2015;2015:849809. Available from: <https://doi.org/10.1155/2015/849809>
- 302 35. Zheng X, Krakowiak J, Patel N, Beyzavi A, Ezike J, Khalil A, et al. Dynamic control of Hsf1 during  
303 heat shock by a chaperone switch and phosphorylation. *eLife*. 2016;5:e18638. Available from:  
304 <https://doi.org/10.7554/eLife.18638>
- 305 36. Krakowiak J, Zheng X, Patel N, Feder ZA, Anandhakar J, Valerius K, et al. Hsf1 and Hsp70 constitute  
306 a two-component feedback loop that regulates the yeast heat shock response. *eLife*. 2018;7:e31668.  
307 Available from: <https://doi.org/10.7554/eLife.31668>
- 308  
309  
310

- 311 37. Lee BJ, Sukri NM, Ogden H, Vine C, Thake CD, Turner JE, et al. A comparison of two commercially  
312 available ELISA methods for the quantification of human plasma heat shock protein 70 during rest and  
313 exercise stress. *Cell Stress Chaperones*. 2015;20(6):917–926. Available from:  
314 <https://doi.org/10.1007/s12192-015-0610-3>
- 315 38. Gibson OR, Turner G, Tuttle JA, Taylor L, Watt PW, Maxwell NS. Heat acclimation attenuates  
316 physiological strain and the HSP72, but not HSP90, mRNA response to acute normobaric hypoxia. *J*  
317 *Appl Physiol*. 2015;119:889–899. Available from: <https://doi.org/10.1152/jappphysiol.00332.2015>
- 318 39. Lee BJ, Miller A, James RS, Thake CD. Cross acclimation between heat and hypoxia: heat acclimation  
319 improves cellular tolerance and exercise performance in acute normobaric hypoxia. *Front Physiol*.  
320 2016;7:78. Available from: <https://doi.org/10.3389/fphys.2016.00078>
- 321 40. Heathcote SL, Hassmén P, Zhou S, Stevens CJ. Passive Heating: Reviewing Practical Heat Acclimation  
322 Strategies for Endurance Athletes. *Front Physiol*. 2018;9:1851. Available from:  
323 <https://doi.org/10.3389/fphys.2018.01851>
- 324 41. Dokladny K, Myers OB, Moseley PL. Heat shock response and autophagy-cooperation and control.  
325 *Autophagy*. 2015;11(2):200–213. Available from: <https://doi.org/10.1080/15548627.2015.1009776>
- 326 42. Gibson OR, Taylor L, Watt PW, Maxwell NS. Cross-Adaptation: Heat and Cold Adaptation to Improve  
327 Physiological and Cellular Responses to Hypoxia. *Sports Med*. 2017;47(9):1751–1768. Available from:  
328 <https://doi.org/10.1007/s40279-017-0717-z>

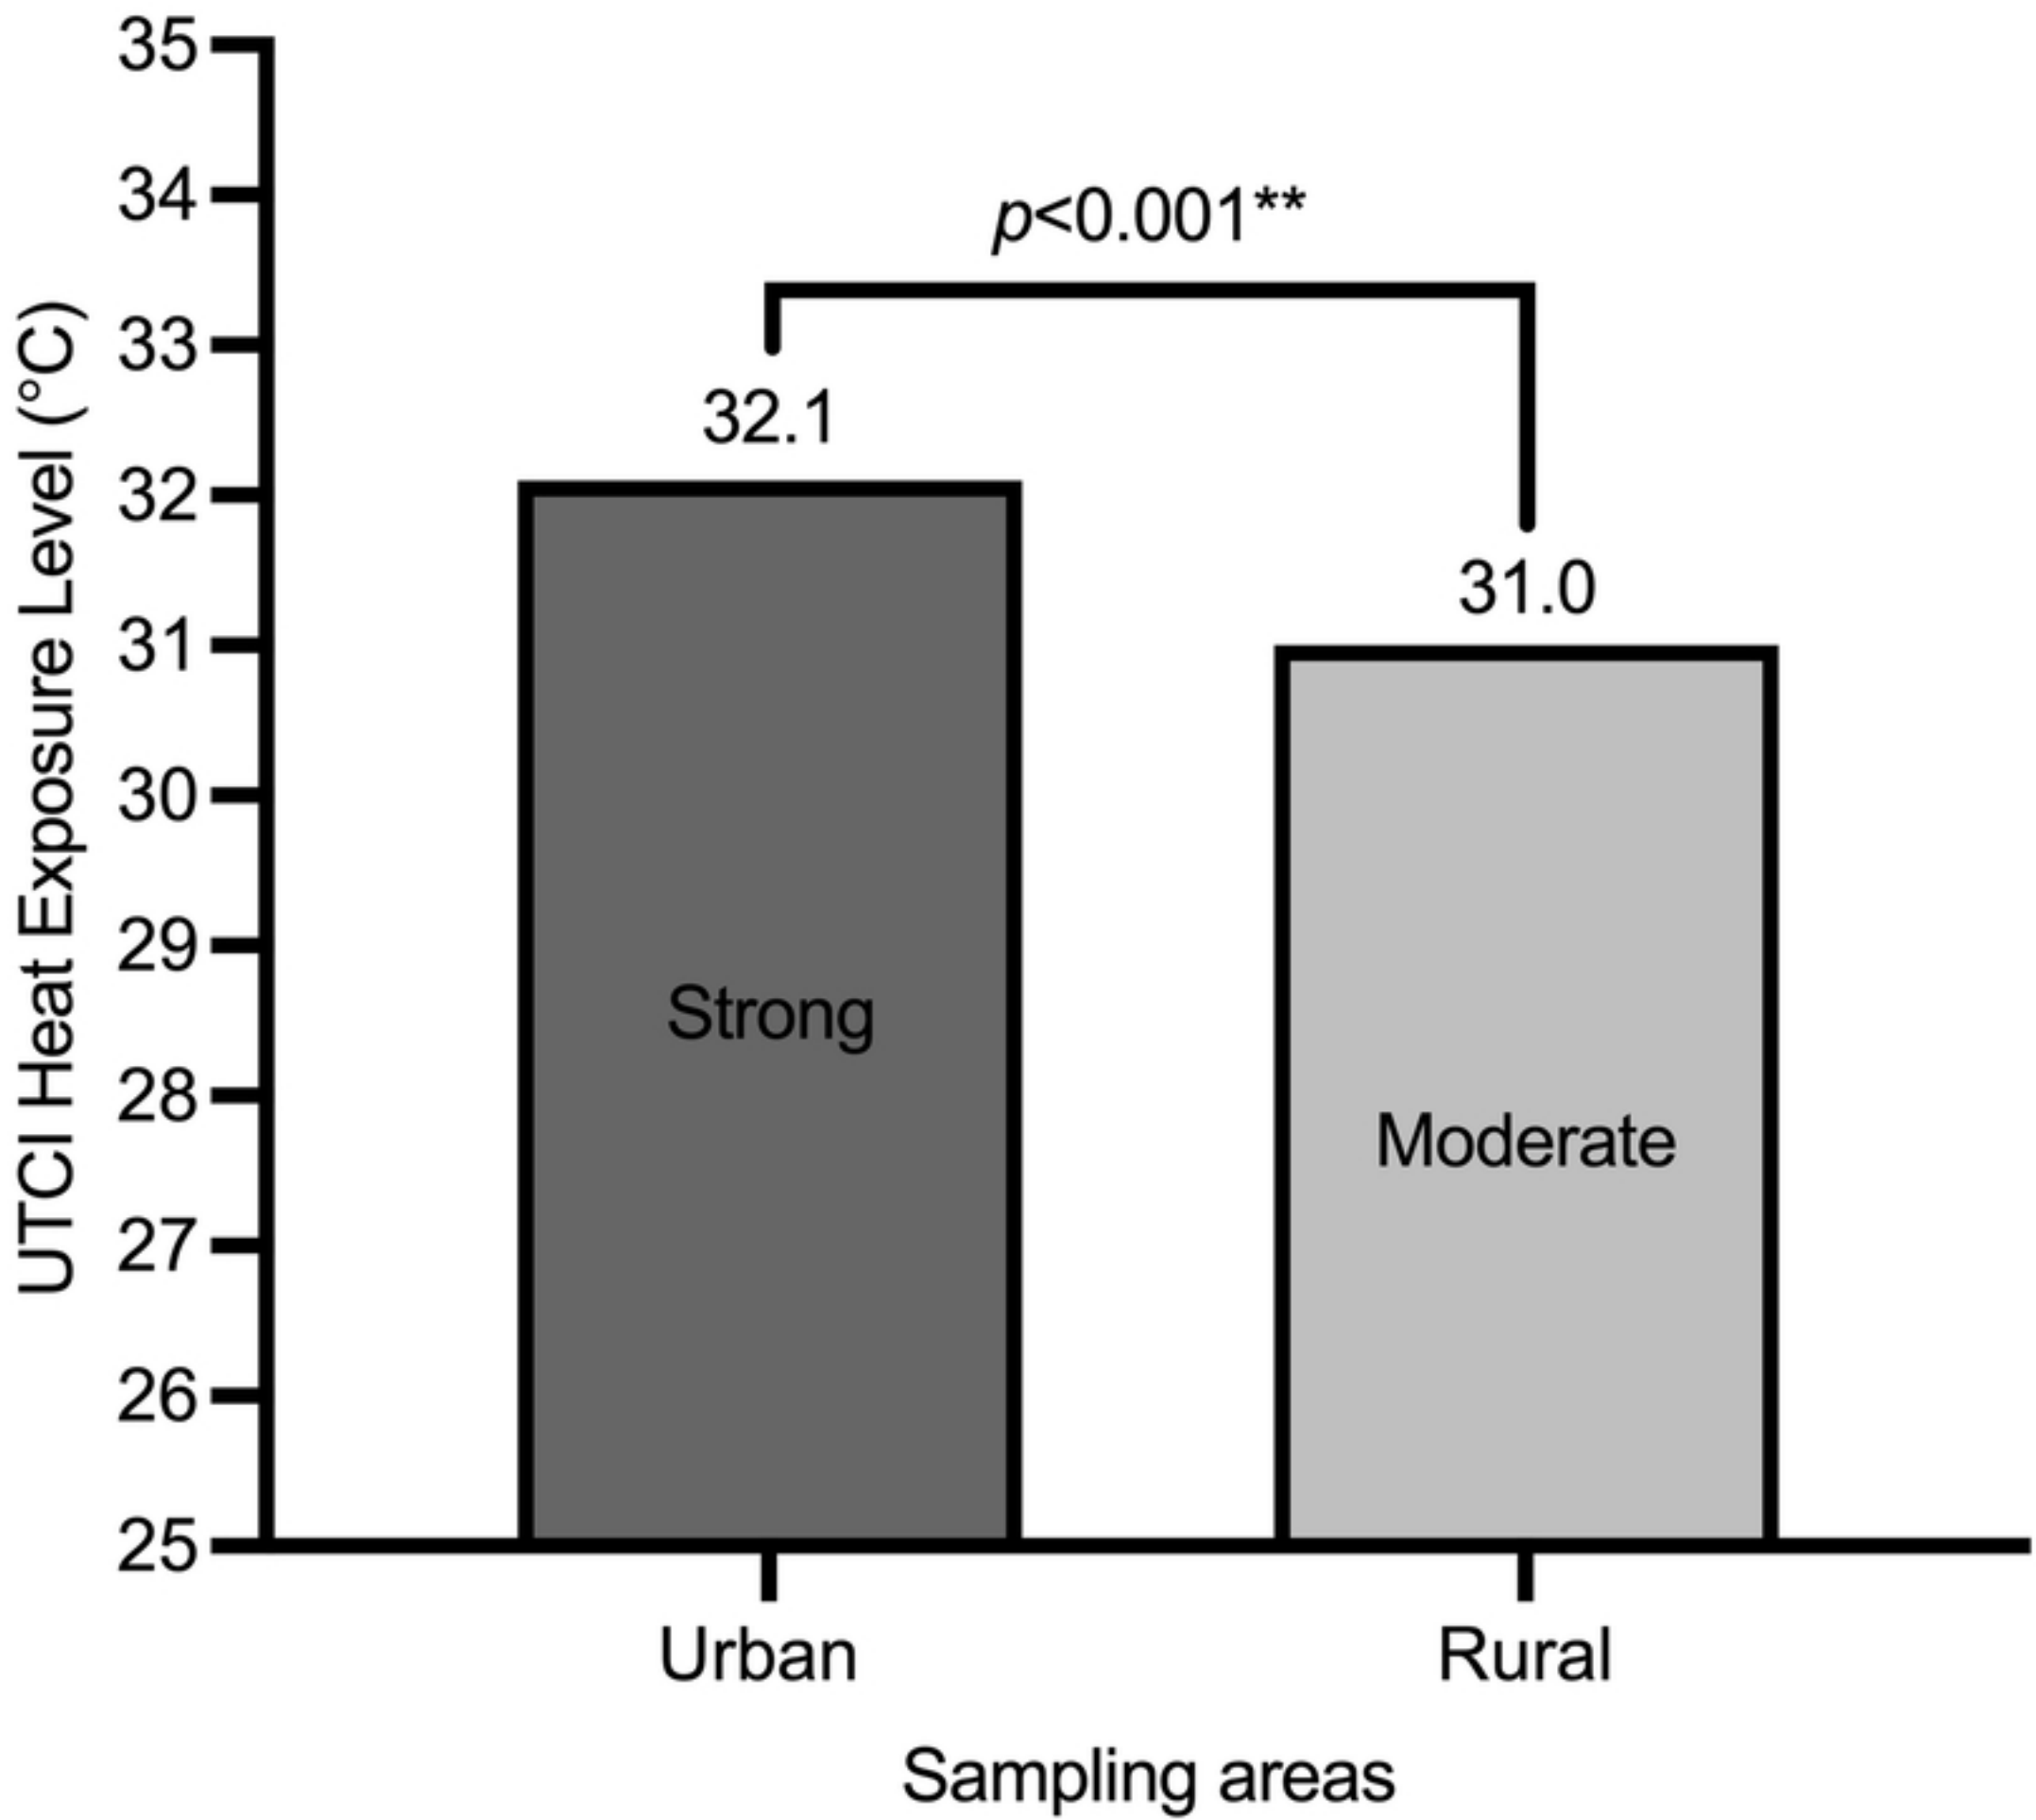

Figure 1

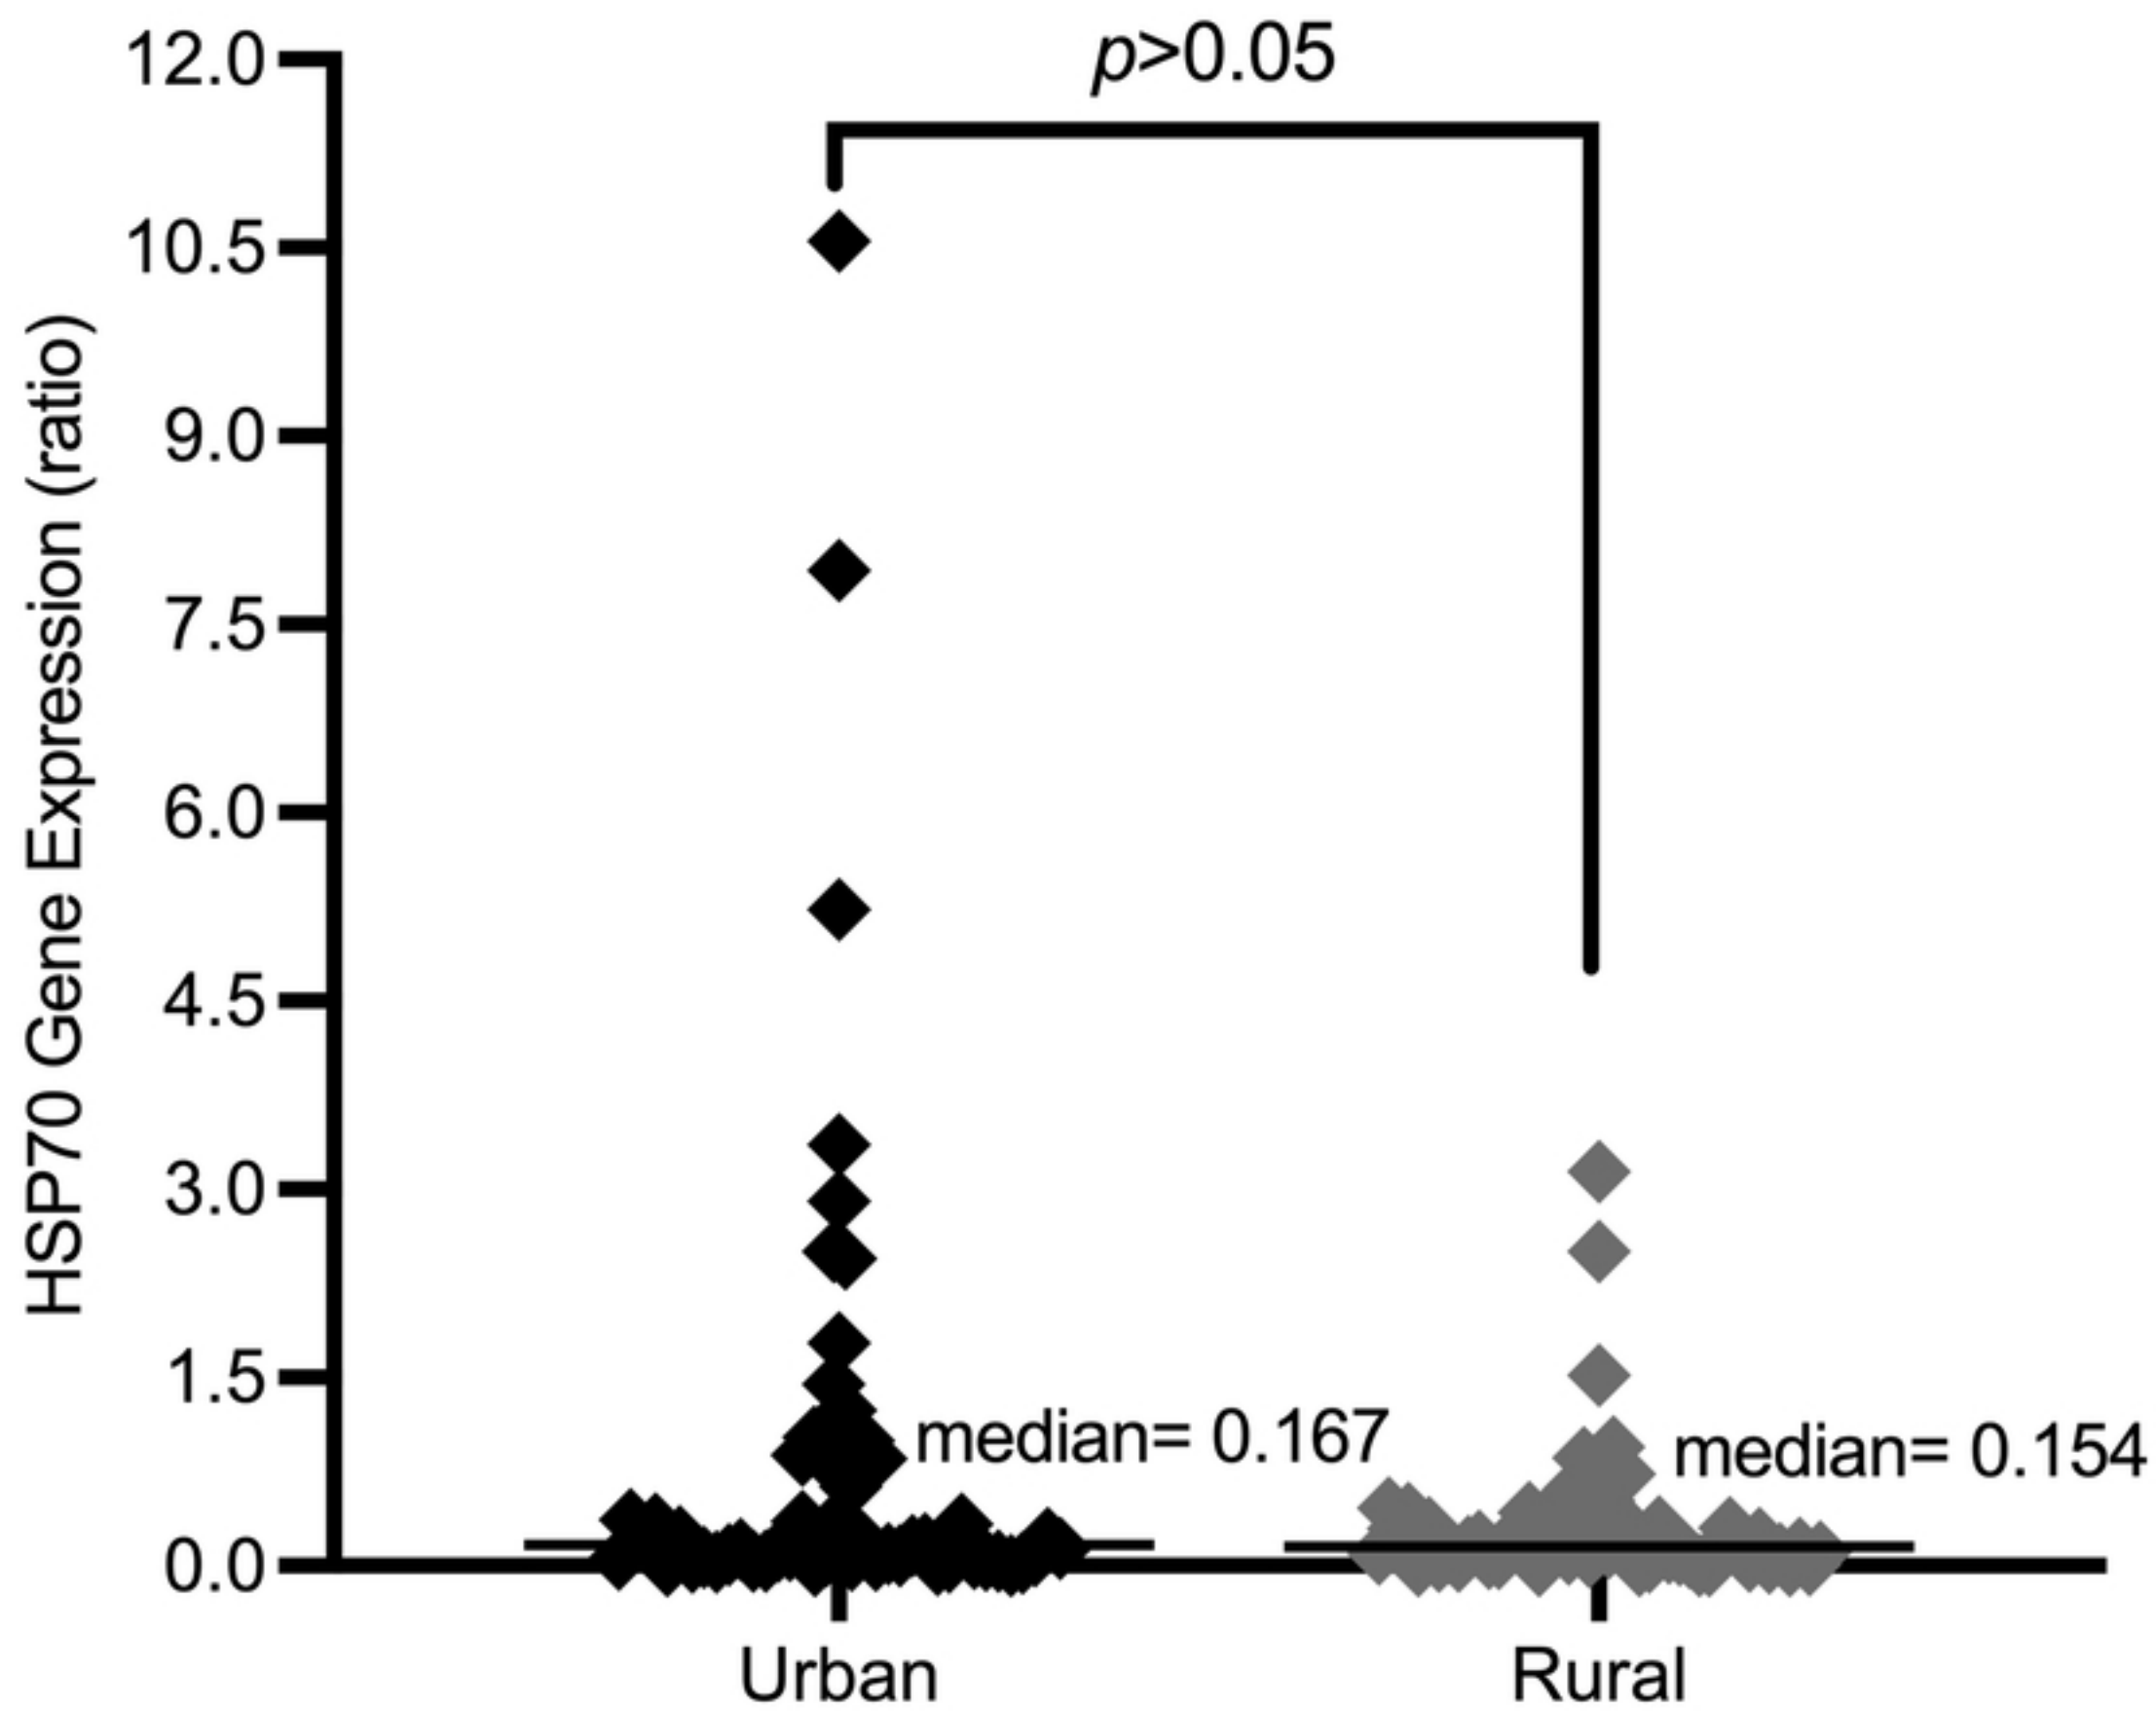

Figure 2



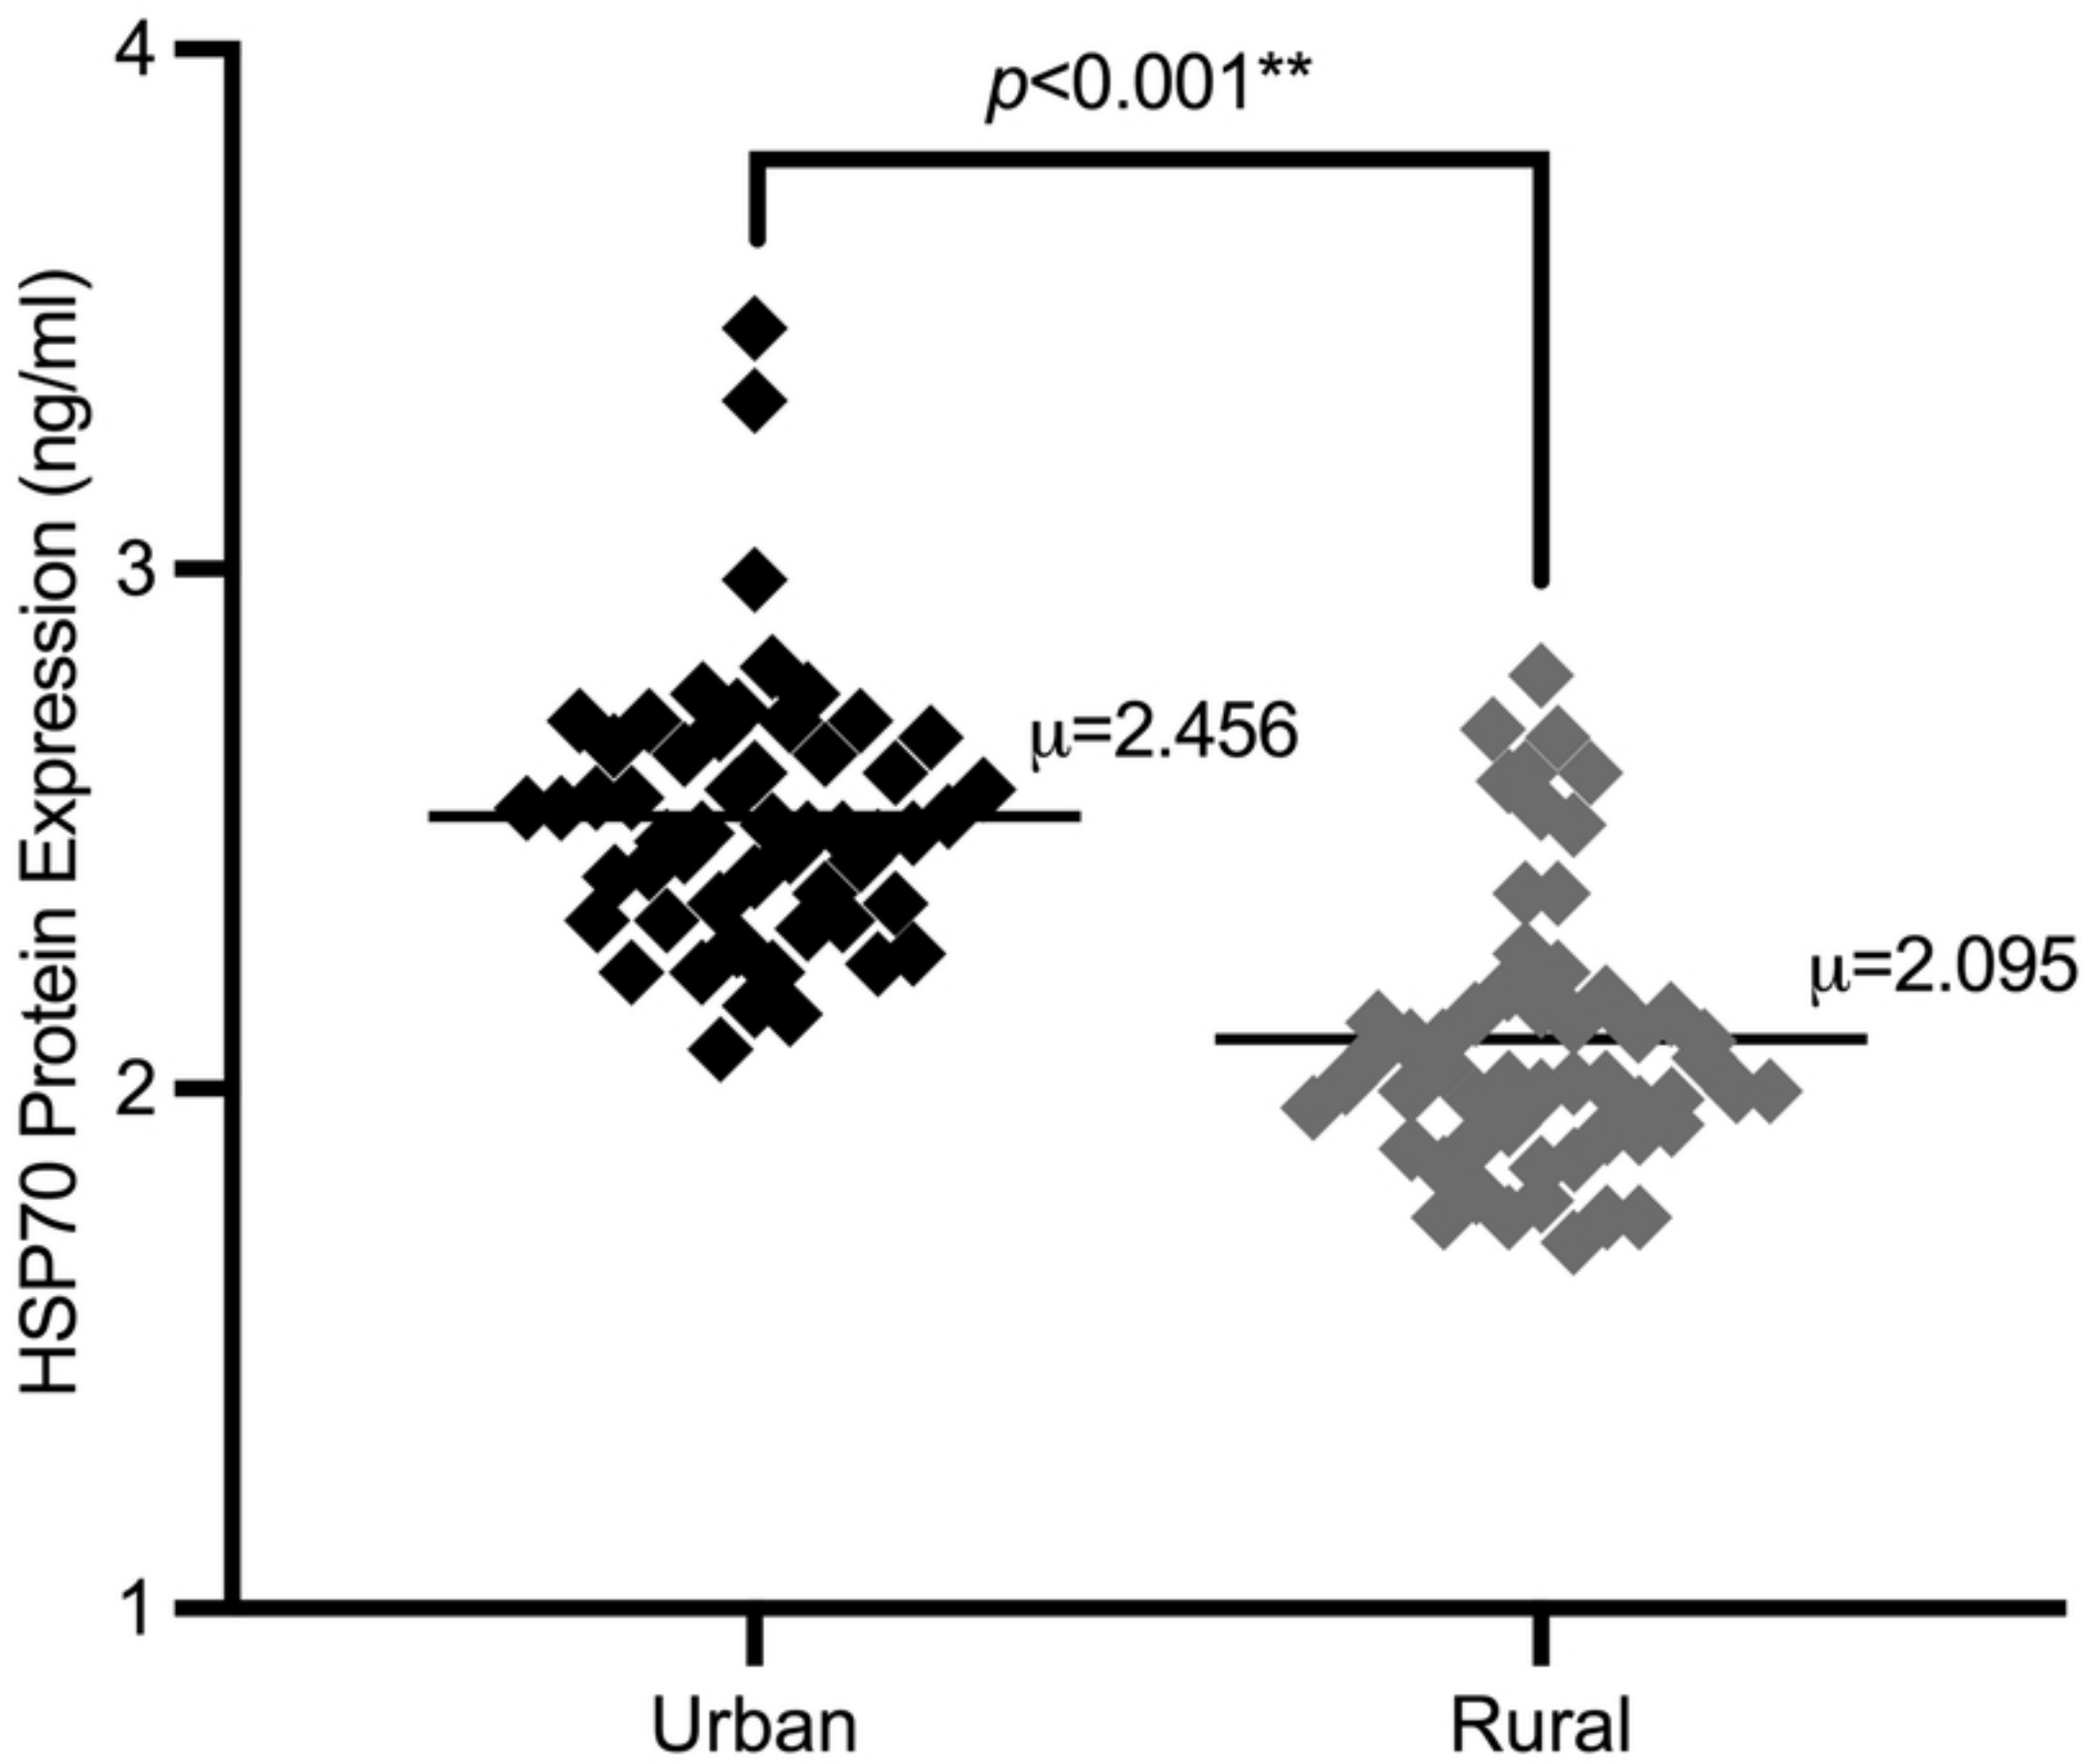

Figure 3
